# Supplementary material for: Bacteria cell templated porous polyaniline facilitated detoxification and recovery of hexavalent chromium
Source: Royal Society of Chemistry journal article supplement (doi:10.1039/c8ta06571c), 2018-01-01
Supplement: c8ta06571c1.pdf [file c8ta06571c1.pdf]

## Supporting materials for

# Bacteria Cell Templated Porous Polyaniline Facilitated Detoxification and Recovery of Hexavalent Chromium

Kedong Gong<sup>1</sup>, Siyuan Guo<sup>1</sup>, Yue Zhao<sup>1</sup>, Qian Hu<sup>1</sup>,

Hu Liu,<sup>2,3</sup> Dezhi Sun<sup>1</sup>, Min Li<sup>1</sup>, Bin Qiu<sup>1,\*</sup>, Zhanhu Guo<sup>2,\*</sup>

<sup>1</sup>Beijing Key Laboratory for Source Control Technology of Water Pollution, College of Environmental Science and Engineering, Beijing Forestry University, Beijing, 100083 China

<sup>2</sup>Integrated Composites Laboratory (ICL), Department of Chemical and Biomolecular Engineering, University of Tennessee, 1512 Middle Dr, Knoxville, TN 37996 USA

<sup>3</sup>National Engineering Research Center for Advanced Polymer Processing Technology, Zhengzhou University, Zhengzhou 450002, China

\*: to whom the correspondence should be addressed

[qiubin2015@bjfu.edu.cn](mailto:qiubin2015@bjfu.edu.cn) (B. Qiu)

[zguo10@utk.edu](mailto:zguo10@utk.edu) (Z. Guo)

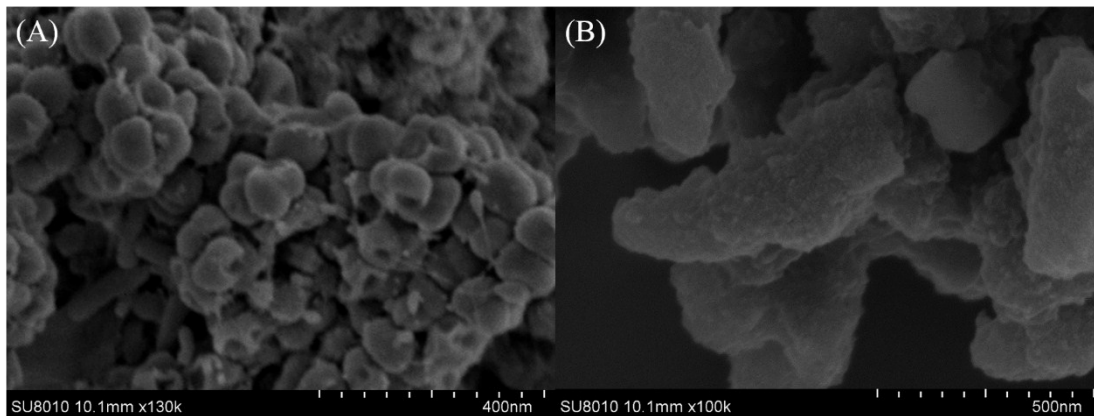

**Fig. S1** SEM images of (A) bacterial used as template and (B) pristine PANI.

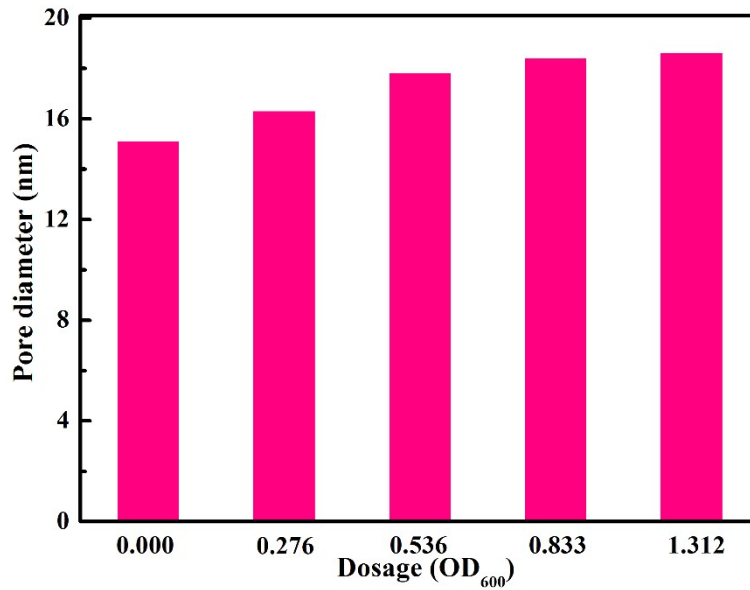

**Fig. S2** Pore size distribution of the synthesized bacteria-templated porous PANI.

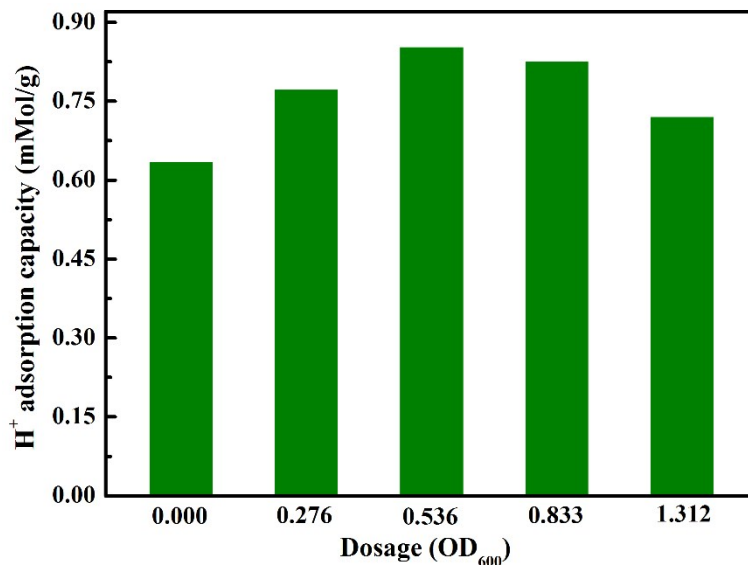

**Fig. S3** H<sup>+</sup> storage capacity of the synthesized porous PANI with different dosages of bacteria template (initial pH = 4).

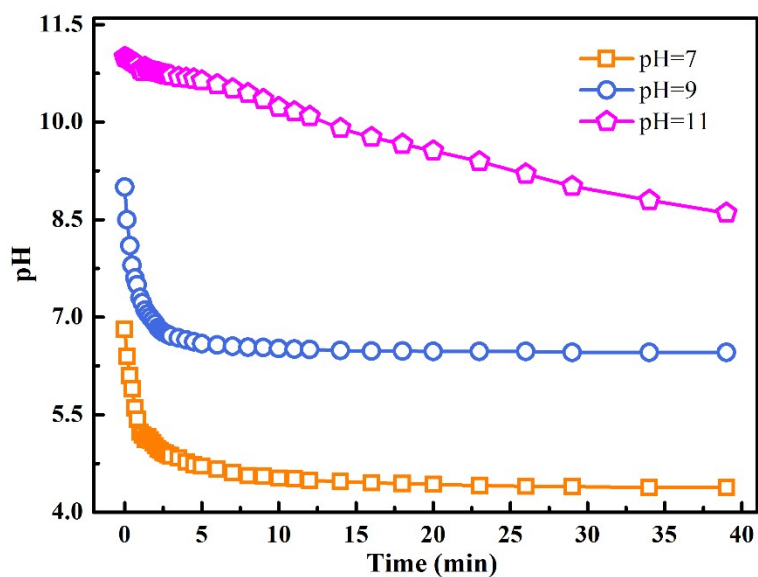

**Fig. S4** H<sup>+</sup> release from the synthesized porous PANI (OD<sub>600</sub> = 0.536) with an initial pH at 7, 9 and 11.

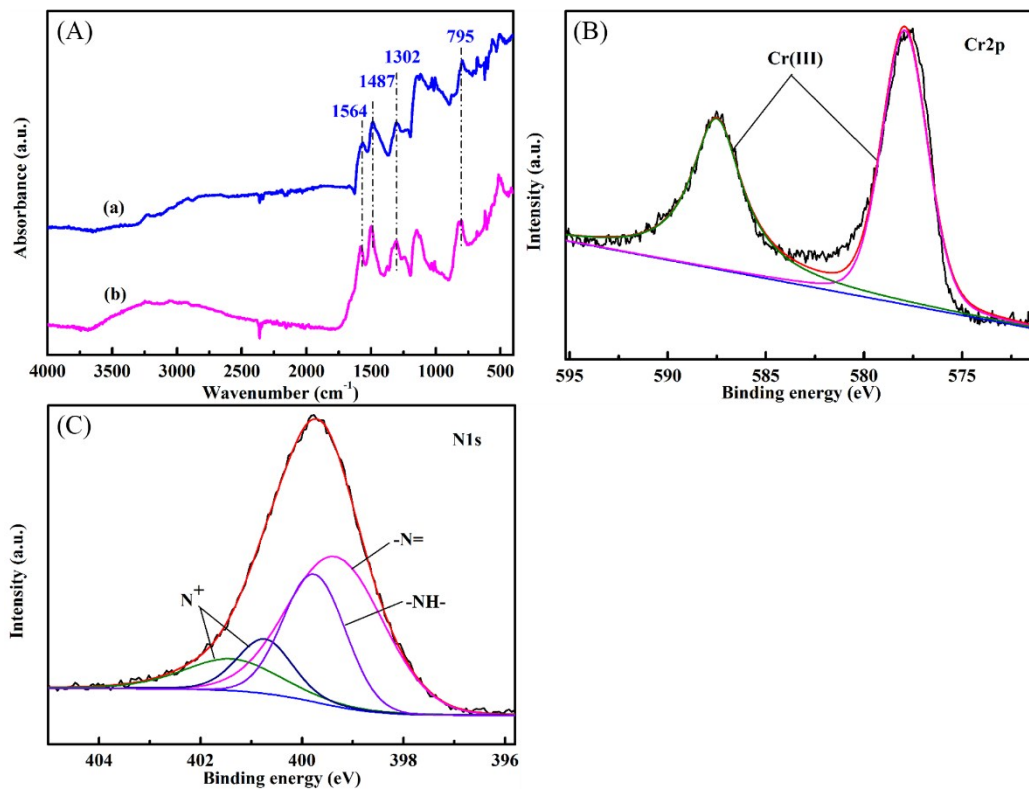

**Fig. S5** (A) FT-IR spectra of porous PANI (a) before and (b) after being treated by Cr(VI) at pH 1.0; (B) Cr2p and (C) N1s XPS spectra of porous PANI after treated with Cr(VI).
